# Supplementary material
Source: PubMed Central journal article supplement (PMC9489121)
Supplement: ERR-0185-2021.SUPPLEMENT.pdf [file ERR-0185-2021.SUPPLEMENT.pdf]

**Supplemental Table 1: Prevalence of psychiatric symptoms after COVID-19**

|                            | Sample size | Follow up     | Questionnaire | Symptom frequency |
|----------------------------|-------------|---------------|---------------|-------------------|
| <b>Insomnia symptoms</b>   |             |               |               |                   |
| Poyraz et al [1]           | 284         | 14 days       | PSQI          | 38.8%             |
| Mazza et al [2]            | 402         | 1 month       | MOS           | 40.0%             |
| Morin et al [3]            | 177         | 4 months      | ISI           | 53.6%             |
| Garrigues et al [4]        | 120         | 3 months      | Self reported | 30.8%             |
| Frontera et al [5]         | 281         | 6 months      | Neuro-QoL     | 36.0%             |
| <b>Anxiety symptoms</b>    |             |               |               |                   |
| Liu et al [6]              | 675         | 1 month       | GAD -7        | 10.4 %            |
| Poyraz et al, [1]          | 284         | 14 days       | HADS          | 18.4 %            |
| Tomasoni et al [7]         | 105         | 1 to 3 months | HADS          | 29.0%             |
| Mazza et al, [2]           | 402         | 1 month       | STAI          | 42.0%             |
| Méndez et al [8]           | 179         | 2 months      | GAD -7        | 29.6%             |
| de Graaf et al [9]         | 81          | 1.5 months    | GAD -7        | 5.0%              |
| Mei et al [10]             | 4328        | 4 months      | GAD -7        | 12.2%             |
| Mazza et al [11]           | 226         | 3 months      | STAI          | 30.0%             |
| Taylor et al [12]          | 675         | 3 months      | GAD -7        | 19.8%             |
| Morin et al, [3]           | 177         | 4 months      | HADS          | 31.4%             |
| Todt et al [13]            | 251         | 3 months      | PHQ-4         | 32.2%             |
| Frontera et al [5]         | 281         | 6 months      | Neuro-QoL     | 46.0%             |
| Fortini et al [14]         | 69          | 3-6 months    | self reported | 22.0%             |
| Van den Borst [15]         | 121         | 2.5 months    | HADS          | 10.0%             |
| Wang et al [16]            | 215         | 2-4 months    | GAD-7         | 24.2%             |
| Carenzo et al [17]         | 47          | 6 months      | EQ-5D-5L      | 21.2%             |
| Hall et al [18]            | 200         | 1 month       | GAD-7         | 11.0%             |
| Raman et al [19]           | 58          | 2-3 months    | GAD-7         | 14.0%             |
| Schandl et al [20]         | 75          | 5 months      | HADS          | 33.0%             |
| Huang et al [21]           | 1733        | 6 months      | EQ-5D-5L      | 23.0%             |
| <b>Depressive symptoms</b> |             |               |               |                   |
| Liu et al [6]              | 675         | 1 month       | PHQ-9         | 19.0 %            |
| Poyraz et al, [1]          | 284         | 14 days       | HADS          | 18.8 %            |
| Tomasoni et al [7]         | 105         | 1 to 3 months | HADS          | 11.0%             |
| Mazza et al, [2]           | 402         | 1 month       | BDI-13        | 31.0%             |
| Méndez et al [8]           | 179         | 2 months      | PHQ-2         | 26.8%             |
| de Graaf et al [9]         | 81          | 1.5 months    | PHQ-9         | 17.0%             |
| Mandal et al [22]          | 384         | 2 months      | PHQ-2         | 14.6%             |
| Mei et al [10]             | 4328        | 4 months      | GAD -7        | 12.2%             |
| Mazza et al [11]           | 226         | 3 months      | BDI-13        | 9.0%              |
| Taylor et al [12]          | 675         | 3 months      | PHQ-2         | 24.1%             |
| Morin et al, [3]           | 177         | 4 months      | HADS          | 21.7%             |
| Todt et al [13]            | 251         | 3 months      | PHQ-4         | 32.2%             |
| Fortini et al [14]         | 69          | 3-6 months    | self reported | 22.0%             |
| Frontera et al [5]         | 281         | 6 months      | Neuro-QoL     | 25.0%             |
| Naidu et al [23]           | 946         | 2 months      | PHQ-2         | 13.8%             |

|                                       |      |               |               |        |
|---------------------------------------|------|---------------|---------------|--------|
| Wang et al [16]                       | 215  | 2-4 months    | CES-D         | 41.6%  |
| Carenzo et al [17]                    | 47   | 6 months      | EQ-5D-5L      | 21.2%  |
| Hall et al [18]                       | 200  | 1 month       | PHQ-9         | 16.0%  |
| Raman et al [19]                      | 58   | 2-3 months    | PHQ-9         | 19.3%  |
| Van den Borst et al [15]              | 121  | 2.5 months    | HADS          | 12.0%  |
| Schandl et al [20]                    | 75   | 5 months      | HADS          | 36.0%  |
| Huang et al [21]                      | 1733 | 6 months      | EQ-5D-5L      | 23.0%  |
| <b>Post-traumatic stress symptoms</b> |      |               |               |        |
| Liu et al [6]                         | 675  | 1 month       | PCL-5         | 12.4 % |
| Poyraz et al, [1]                     | 284  | 14 days       | IES-R         | 25.4%  |
| Mazza et al, [2]                      | 402  | 1 month       | IES-R         | 28.0%  |
| Méndez et al [8]                      | 179  | 2 months      | DTS-17        | 25.1%  |
| de Graaf et al [9]                    | 81   | 1.5 months    | PCL-5         | 10.0%  |
| Mazza et al [11]                      | 226  | 3 months      | IES-R         | 22.0%  |
| Taylor et al [12]                     | 675  | 3 months      | TSQ           | 15.4%  |
| Morin et al, [3]                      | 177  | 4 months      | PCL-5         | 14.2%  |
| Halpin et al [24]                     | 100  | 1 to 2 months | Self reported | 31.0%  |
| Bellan et al [25]                     | 232  | 4 months      | IES-R         | 42.9%  |
| Van den Borst et al [15]              | 121  | 2.5 months    | IES-R         | 10.0%  |
| Naidu et al [23]                      | 946  | 2 months      | PHQ-2         | 10.5%  |
| Wang et al [16]                       | 215  | 2-4 months    | PTSD-5        | 34.1%  |
| Carenzo et al [17]                    | 47   | 6 months      | IES-R         | 57.4%  |
| Yuan et al [26]                       | 134  | 3 to 6 months | PCL-5         | 18.8%  |
| Schandl et al [20]                    | 75   | 5 months      | PTSS          | 35.0%  |
| Frontera et al [5]                    | 281  | 6 months      | Neuro-QoL     | 36.0%  |

BDI-13 : Beck Depression Inventory 13 items, CEZS-D Center for Epidemiologic Studies Depression Scale, DTS-17 : Davidson trauma Scale 17 items, EQ-5D-5L : Euro-QoL-5 dimensions-5 levels, GAD-7 : Generalized Anxiety Disorder 7 items, HADS : Hospital Anxiety and Depression Scale, IESR : Impact of Events Scale-Revised, ISI: Insomnia Severity Index, Neuro-QoL : Neurological- Quality of life, MOS: Medical Outcomes Study Sleep Scale PCL-5 : PTSD CheckList for DSM-5, PHQ : Patient's Health Questionnaire, Pittsburgh Sleep Quality Index: PSQI, PTSD-5 PTSD screen for DSM-5, PTSS : Post Traumatic Symptoms Scale, STAI : State Trait Anxiety Inventory, TSQ : Trauma Screening Questionnaire, WEMS :Warwick-Edinburgh Mental Wellbeing Scales

## REFERENCES

1. Poyraz BÇ, Poyraz CA, Olgun Y, Gürel Ö, Alkan S, Özdemir YE, Balkan İİ, Karaali R. Psychiatric morbidity and protracted symptoms after COVID-19. *Psychiatry Res* 2021; 295: 113604.
2. Mazza MG, De Lorenzo R, Conte C, Poletti S, Vai B, Bollettini I, Melloni EMT, Furlan R, Ciceri F, Rovere-Querini P, COVID-19 BioB Outpatient Clinic Study group, Benedetti F. Anxiety and depression in COVID-19 survivors: Role of inflammatory and clinical predictors. *Brain Behav Immun* 2020; 89: 594–600.
3. Writing Committee for the COMEBAC Study Group, Morin L, Savale L, Pham T, Colle R, Figueiredo S, Harrois A, Gasnier M, Lecoq A-L, Meyrignac O, Noel N, Baudry E, Bellin M-F, Beurnier A, Choucha W, Corruble E, Dortet L, Hardy-Leger I, Radiguer F, Sportouch S, Verny C, Wyplosz B, Zaidan M, Becquemont L, Montani D, Monnet X. Four-Month Clinical Status of a Cohort of Patients After Hospitalization for COVID-19. *JAMA* 2021; .
4. Garrigues E, Janvier P, Kherabi Y, Le Bot A, Hamon A, Gouze H, Doucet L, Berkani S, Oliosi E, Mallart E, Corre F, Zarrouk V, Moyer J-D, Galy A, Honsel V, Fantin B, Nguyen Y. Post-discharge persistent symptoms and health-related quality of life after hospitalization for COVID-19. *J Infect* 2020; 81: e4–e6.
5. Frontera JA, Yang D, Lewis A, Patel P, Medicherla C, Arena V, Fang T, Andino A, Snyder T, Madhavan M, Gratch D, Fuchs B, Dessy A, Canizares M, Jauregui R, Thomas B, Bauman K, Olivera A, Bhagat D, Sonson M, Park G, Stainman R, Sunwoo B, Talmasov D, Tamimi M, Zhu Y, Rosenthal J, Dygert L, Ristic M, Ishii H, et al. A prospective study of long-term outcomes among hospitalized COVID-19 patients with and without neurological complications. *J Neurol Sci* 2021; 426: 117486.
6. Liu D, Baumeister RF, Veilleux JC, Chen C, Liu W, Yue Y, Zhang S. Risk factors associated with mental illness in hospital discharged patients infected with COVID-19 in Wuhan, China. *Psychiatry Res* 2020; 292: 113297.
7. Tomasoni D, Bai F, Castoldi R, Barbanotti D, Falcinella C, Mulè G, Mondatore D, Tavelli A, Vegni E, Marchetti G, d'Arminio Monforte A. Anxiety and depression symptoms after virological clearance of COVID-19: A cross-sectional study in Milan, Italy. *J Med Virol* 2021; 93: 1175–1179.
8. Méndez R, Balanzá-Martínez V, Luperdi SC, Estrada I, Latorre A, González-Jiménez P, Feced L, Bouzas L, Yépez K, Ferrando A, Hervás D, Zaldívar E, Reyes S, Berk M, Menéndez R. Short-term neuropsychiatric outcomes and quality of life in COVID-19 survivors. *J Intern Med* 2021; .
9. de Graaf MA, Antoni ML, Ter Kuile MM, Arbous MS, Duiniveld AJF, Feltkamp MCW, Groeneveld GH, Hinnen SCH, Janssen VR, Lijfering WM, Omara S, Postmus PE, Ramai SRS, Rius-Ottenheim N, Schalij MJ, Schiemanck SK, Smid L, Stöger JL, Visser LG, de Vries JJC, Wijngaarden MA, Geelhoed JJM, Roukens AHE. Short-term outpatient follow-up of COVID-19 patients: A multidisciplinary approach. *EClinicalMedicine* 2021; 32: 100731.
10. Mei Q, Wang F, Bryant A, Wei L, Yuan X, Li J. Mental health problems among COVID-19 survivors in Wuhan, China. *World Psychiatry* 2021; 20: 139–140.
11. Mazza MG, Palladini M, De Lorenzo R, Magnaghi C, Poletti S, Furlan R, Ciceri F, COVID-19 BioB Outpatient Clinic Study group, Rovere-Querini P, Benedetti F. Persistent psychopathology and neurocognitive impairment in COVID-19 survivors: Effect of inflammatory biomarkers at three-month follow-up. *Brain Behav Immun* 2021; 94: 138–147.

12. Taylor RR, Trivedi B, Patel N, Singh R, Ricketts WM, Elliott K, Yarwood M, White V, Hylton H, Allen R, Thomas G, Kapil V, McGuckin R, Pfeffer PE. Post-COVID symptoms reported at asynchronous virtual review and stratified follow-up after COVID-19 pneumonia. *Clin Med (Lond)* 2021; : clinmed.2021-0037.
13. Todt BC, Szlejf C, Duim E, Linhares AOM, Kogiso D, Varela G, Campos BA, Baghelli Fonseca CM, Polesso LE, Bordon INS, Cabral BT, Amorim VLP, Piza FMT, Degani-Costa LH. Clinical outcomes and quality of life of COVID-19 survivors: A follow-up of 3 months post hospital discharge. *Respir Med* 2021; 184: 106453.
14. Fortini A, Torrigiani A, Sbaragli S, Lo Forte A, Crociani A, Cecchini P, Innocenti Bruni G, Faraone A. COVID-19: persistence of symptoms and lung alterations after 3-6 months from hospital discharge. *Infection* 2021; .
15. van den Borst B, Peters JB, Brink M, Schoon Y, Bleeker-Rovers CP, Schers H, van Hees HWH, van Helvoort H, van den Boogaard M, van der Hoeven H, Reijers MH, Prokop M, Vercoulen J, van den Heuvel M. Comprehensive health assessment three months after recovery from acute COVID-19. *Clin Infect Dis* 2020; : ciaa1750.
16. Wang PR, Oyem PC, Viguera AC. Prevalence of psychiatric morbidity following discharge after COVID-19 hospitalization. *Gen Hosp Psychiatry* 2021; 69: 131–132.
17. Careno L, Protti A, Dalla Corte F, Aceto R, Iapichino G, Milani A, Santini A, Chiurazzi C, Ferrari M, Heffler E, Angelini C, Aghemo A, Ciccarelli M, Chiti A, Iwashyna TJ, Herridge MS, Cecconi M, Humanitas COVID-19 Task Force. Short-term health-related quality of life, physical function and psychological consequences of severe COVID-19. *Ann Intensive Care* 2021; 11: 91.
18. Hall J, Myall K, Lam JL, Mason T, Mukherjee B, West A, Dewar A. Identifying patients at risk of post-discharge complications related to COVID-19 infection. *Thorax* 2021; 76: 408–411.
19. Raman B, Cassar MP, Tunnicliffe EM, Filippini N, Griffanti L, Alfaro-Almagro F, Okell T, Sheerin F, Xie C, Mahmud M, Mózes FE, Lewandowski AJ, Ohuma EO, Holdsworth D, Lamlum H, Woodman MJ, Krasopoulos C, Mills R, McConnell FAK, Wang C, Arthofer C, Lange FJ, Andersson J, Jenkinson M, Antoniadou C, Channon KM, Shanmuganathan M, Ferreira VM, Piechnik SK, Klenerman P, et al. Medium-term effects of SARS-CoV-2 infection on multiple vital organs, exercise capacity, cognition, quality of life and mental health, post-hospital discharge. *EClinicalMedicine* 2021; 31: 100683.
20. Schandl A, Hedman A, Lyngå P, Fathi Tachinabad S, Svefors J, Roël M, Geborek A, Andersson Franko M, Söderberg M, Joelsson-Alm E, Darlington P. Long-term consequences in critically ill COVID-19 patients: A prospective cohort study. *Acta Anaesthesiol Scand* 2021; .
21. Huang C, Huang L, Wang Y, Li X, Ren L, Gu X, Kang L, Guo L, Liu M, Zhou X, Luo J, Huang Z, Tu S, Zhao Y, Chen L, Xu D, Li Y, Li C, Peng L, Li Y, Xie W, Cui D, Shang L, Fan G, Xu J, Wang G, Wang Y, Zhong J, Wang C, Wang J, et al. 6-month consequences of COVID-19 in patients discharged from hospital: a cohort study. *Lancet* 2021; 397: 220–232.
22. Mandal S, Barnett J, Brill SE, Brown JS, Denny EK, Hare SS, Heightman M, Hillman TE, Jacob J, Jarvis HC, Lipman MCI, Naidu SB, Nair A, Porter JC, Tomlinson GS, Hurst JR, ARC Study Group. “Long-COVID”: a cross-sectional study of persisting symptoms, biomarker and imaging abnormalities following hospitalisation for COVID-19. *Thorax* 2021; 76: 396–398.

23. Naidu SB, Shah AJ, Saigal A, Smith C, Brill SE, Goldring J, Hurst JR, Jarvis H, Lipman M, Mandal S. The high mental health burden of “Long COVID” and its association with on-going physical and respiratory symptoms in all adults discharged from hospital. *Eur Respir J* 2021; 57: 2004364.
24. Halpin SJ, Mclvor C, Whyatt G, Adams A, Harvey O, McLean L, Walshaw C, Kemp S, Corrado J, Singh R, Collins T, O’Connor RJ, Sivan M. Postdischarge symptoms and rehabilitation needs in survivors of COVID-19 infection: A cross-sectional evaluation. *J Med Virol* 2021; 93: 1013–1022.
25. Bellan M, Soddu D, Balbo PE, Baricich A, Zeppego P, Avanzi GC, Baldon G, Bartolomei G, Battaglia M, Battistini S, Binda V, Borg M, Cantaluppi V, Castello LM, Clivati E, Cisari C, Costanzo M, Croce A, Cuneo D, De Benedittis C, De Vecchi S, Feggi A, Gai M, Gambaro E, Gattoni E, Gramaglia C, Grisafi L, Guerriero C, Hayden E, Jona A, et al. Respiratory and Psychophysical Sequelae Among Patients With COVID-19 Four Months After Hospital Discharge. *JAMA Netw Open* 2021; 4: e2036142.
26. Yuan Y, Liu Z-H, Zhao Y-J, Zhang Q, Zhang L, Cheung T, Jackson T, Jiang G-Q, Xiang Y-T. Prevalence of Post-traumatic Stress Symptoms and Its Associations With Quality of Life, Demographic and Clinical Characteristics in COVID-19 Survivors During the Post-COVID-19 Era. *Front Psychiatry* 2021; 12: 665507.
